# Supplementary material for: Sm16, a major component of Schistosoma mansoni cercarial excretory/secretory products, prevents macrophage classical activation and delays antigen processing
Source: PubMed Central journal article supplement (PMC4297449; doi:10.1186/s13071-014-0608-1), 2015-01-06

Figure S1. Characterization of bone marrow cells as macrophages

A

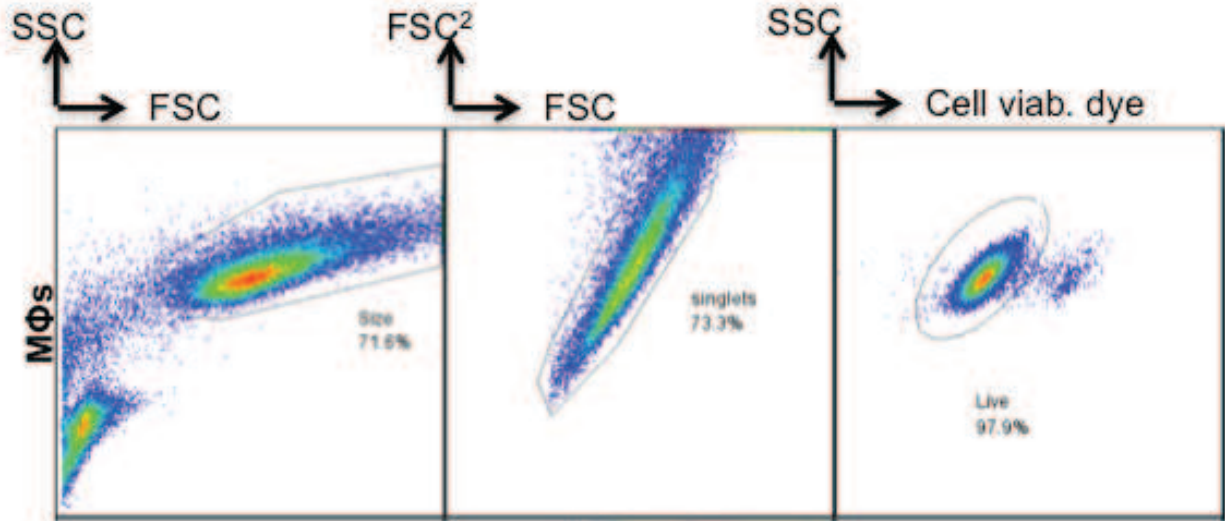

B

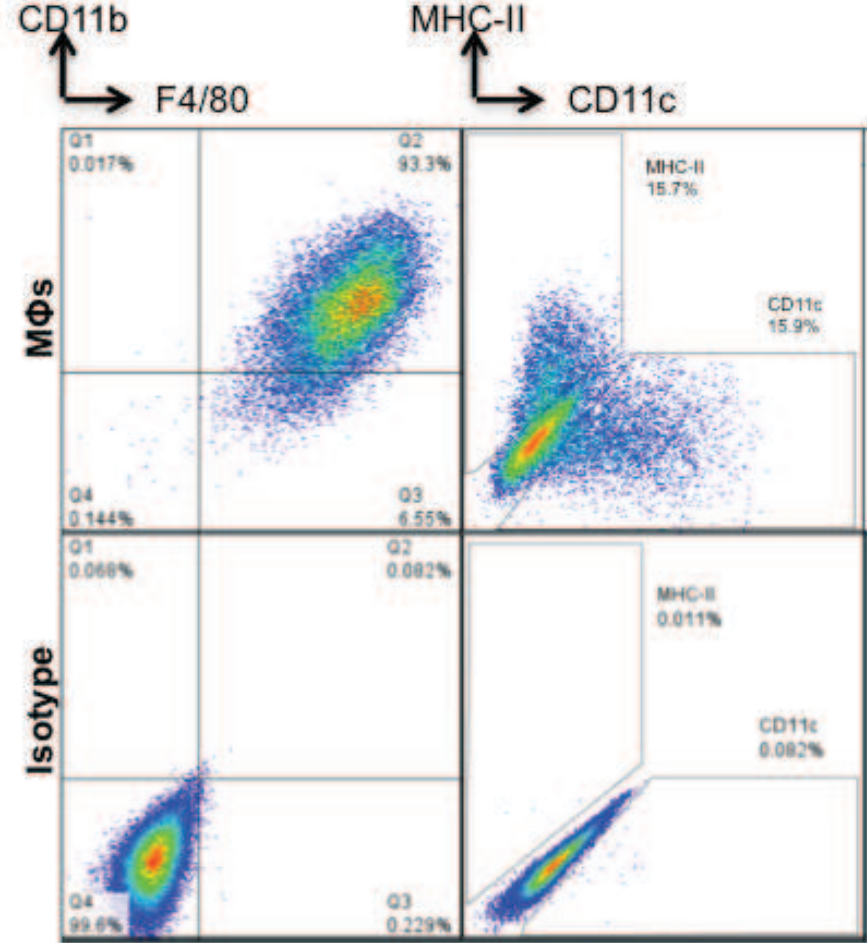

Supplement: 13071_2014_608_MOESM1_ESM.pdf [file 13071_2014_608_MOESM1_ESM.pdf]
