# Supplementary material for: Sm16, a major component of Schistosoma mansoni cercarial excretory/secretory products, prevents macrophage classical activation and delays antigen processing
Source: PubMed Central journal article supplement (PMC4297449; doi:10.1186/s13071-014-0608-1), 2015-01-06
Supplement: 13071_2014_608_MOESM3_ESM.pdf [file 13071_2014_608_MOESM3_ESM.pdf]

**Table S1**

| Identified protein bands |                               |              |               |                             |                   |
|--------------------------|-------------------------------|--------------|---------------|-----------------------------|-------------------|
| Name                     | Gene ID                       | Mascot score | Peptide Score | Peptides identified         | Peptide mass (Da) |
| Invadolysin              | Smp_090100                    | 826          | 30            | K.ALNFWER.T                 | 935.4714          |
|                          |                               |              | 51            | K.AFGICAVGR.F               | 950.4852          |
|                          |                               |              | 35            | R.CPLIQPMR.S                | 1014.515          |
|                          |                               |              | 83            | R.GCVEPVFYTDGR.T            | 1399.615          |
|                          |                               |              | 94            | K.QIQGEIICPNPNIACR.N        | 1882.908          |
|                          |                               |              | 102           | K.TMLIGTAIHELGHALGFVK.S     | 2008.077          |
|                          |                               |              | 65            | K.NLGCSFVMESCYAYMMR.M       | 2118.828          |
|                          |                               |              | 137           | R.LPPTEQYFNDPTQGGTSQLNDR.C  | 2449.125          |
|                          |                               |              | 79            | R.SFFNEPLVITYCDHQLNIPVAQR.G | 2648.251          |
| 151                      | K.ALCYDHPVPDQYASGCAMGGGGDIR.D | 2724.123     |               |                             |                   |
| Sm16                     | Smp_113760                    | 70           | 31            | K.GRHHIYK.V                 | 910.4909          |
|                          |                               |              | 41            | K.SICNEIKR.S                | 1019.542          |
