# Supplementary material for: Sm16, a major component of Schistosoma mansoni cercarial excretory/secretory products, prevents macrophage classical activation and delays antigen processing
Source: PubMed Central journal article supplement (PMC4297449; doi:10.1186/s13071-014-0608-1), 2015-01-06

Figure S4. BMM $\phi$ s stimulated with recombinant Sm16 and *S. mansoni* cercarial secretions (0-3hRP) produced enhanced IL-10 and reduced IL-12p40.

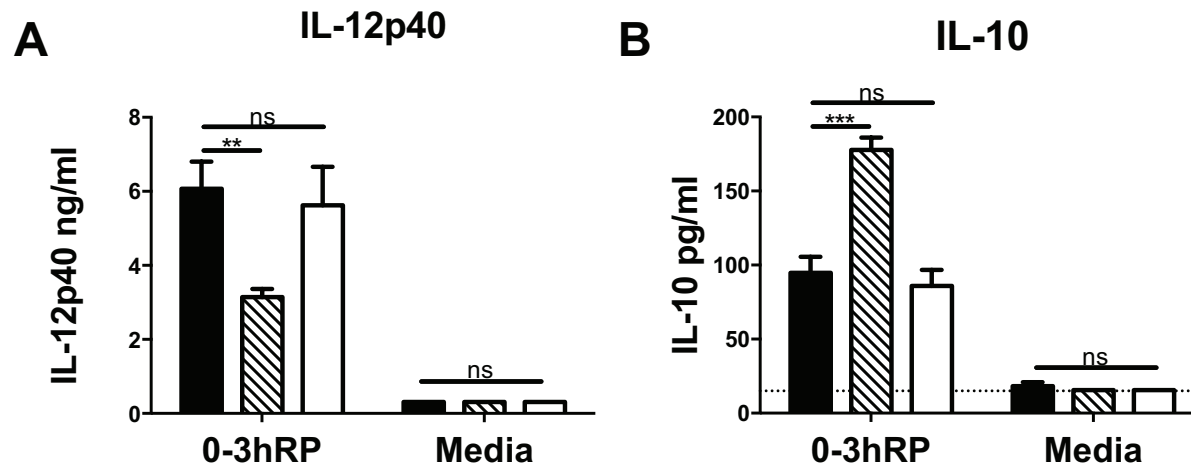

Supplement: 13071_2014_608_MOESM5_ESM.pdf [file 13071_2014_608_MOESM5_ESM.pdf]
